1 **Facilitation and biodiversity jointly drive mutualistic networks**

2

3 Gianalberto Losapio<sup>1</sup>, Elizabeth Norton Hasday<sup>2</sup>, Xavier Espadaler<sup>3</sup>, Christoph

4 Germann<sup>4</sup>, Javier Ortiz<sup>5</sup>, Adrian Pont<sup>6</sup>, Daniele Sommaggio<sup>7</sup>, Christian Schöb<sup>9</sup>

5

6 <sup>1</sup>Department of Biology, Stanford University, 94305 California, USA.

7 <sup>2</sup>Department of Evolutionary Biology and Environmental Studies, University of Zurich,

8 8057 Zurich, Switzerland.

9 <sup>3</sup>CREAF, Autonomous University of Barcelona, 08193 Bellaterra, Spain.

10 <sup>4</sup>Naturhistorisches Museum Basel, Augustinergasse 2, 4001 Basel, Switzerland.

11 <sup>5</sup>Grupo de Investigación "Transferencia de I+D en el Área de Recursos Naturales",

12 Universidad de Almería, E-04120 La Cañada Almería, Spain.

13 <sup>6</sup>Oxford University Museum of Natural History, Parks Road, Oxford OX1 3PW, UK.

14 <sup>7</sup>Department of Agricultural and Food Sciences, Alma Mater Studiorum-Università di

15 Bologna, 40127 Bologna, Italy.

16 <sup>9</sup>Department of Environmental Systems Science, ETH Zurich, 8092 Zurich, Switzerland.

17

18 Correspondence author: Gianalberto Losapio, [losapiog@stanford.edu](mailto:losapiog@stanford.edu)

19 **ABSTRACT**

20 1. Facilitation by legume nurse plants increase understorey diversity and support  
21 diverse ecological communities. In turn, biodiversity shapes ecological networks and  
22 supports ecosystem functioning. However, whether and how facilitation and increased  
23 biodiversity jointly influence community structure and ecosystem functioning remains  
24 unclear.

25 2. We performed a field experiment disentangling the relative contribution of nurse  
26 plants and increasing understorey plant diversity in driving pollination interactions to  
27 quantify the direct and indirect contribution of facilitation and diversity to ecosystem  
28 functioning. This includes analysing pollinator communities in the following treatment  
29 combinations: (i) absence and presence of nurse plants, and (ii) understorey richness  
30 with none, one and three plant species.

31 3. Facilitation by legume nurse plants and understorey diversity synergistically increase  
32 pollinator diversity. Our findings reflect diverse assemblages in which complementarity  
33 and cooperation among different plants result in no costs for individual species but  
34 benefits for the functioning of the community and the ecosystem. Drivers of network  
35 change are associated with increasing frequency of visits and non-additive changes in  
36 pollinator community composition and pollination niches.

37 4. *Synthesis* Plant–plant facilitative systems, where a nurse shrub increases understorey  
38 plant diversity, positively influences mutualistic networks via both direct nurse effects  
39 and indirect plant diversity effects. Supporting such nurse systems is crucial not only for  
40 plant diversity but also for ecosystem functioning and services.

41

42 Keywords

43 Biodiversity, Ecological networks, Ecosystem function and services, Multi-trophic  
44 interactions, Nurse plants, Plant–Plant–Insect interactions, Pollination, *Retama*  
45 *sphaerocarpa*, Synergism, Woodland

46

## 47 **1 INTRODUCTION**

48 Ecologists started appreciating the importance of positive species interactions for  
49 biological communities only in the last few decades (Connell & Slatyer 1977; DeAngelis  
50 et al. 1986; Hunter & Aarssen 1988; Bertness & Callaway 1994). Today, the fact that  
51 plants provide wider benefits to other species and enhance biodiversity and ecosystem  
52 functioning is a well-consolidated notion in ecology (Bruno et al., 2003; Callaway, 2007;  
53 Levin, 2009; Keddy, 2017; Ellison, 2019). Likewise, the debate around the role of  
54 diversity in the functioning and stability of ecological communities has been resolved in  
55 favour of positive biodiversity effects (Chapin et al., 2000; Hooper et al., 2005; Tilman et  
56 al., 2014; IPBES, 2019). Yet, whether and how facilitation and biodiversity jointly  
57 influence community structure and ecosystem functioning remains less clear.

58       Although processes underpinning facilitation may be contingent on the organisms  
59 involved and their environment (Brooker et al., 2008), as common in ecology (Lawton,  
60 1999), facilitation is relevant to many different ecosystems (Callaway, 2007; McIntire &  
61 Fajardo, 2014; Liancourt & Dolezal 2020) beyond specific communities (e.g., cushion  
62 plants, kelp forests) and extreme environments (salt marshes, sand dunes, alpine  
63 screes). Certain species called ‘nurse plants’ can ameliorate local environmental  
64 conditions and increase biodiversity in their understorey and in the entire ecosystem  
65 (Pugnaire, 2010; Butterfield et al., 2013; Cavieres et al., 2014; Rodríguez-Echeverría et  
66 al., 2016; Ellison, 2019). By increasing both resources and biodiversity, plant facilitation  
67 can ultimately increase ecosystem functioning, such as biomass production (Wright &

68 Jones, 2004; Michalet & Touzard, 2010; Wright et al. 2017, Schöb et al. 2019) and the  
69 flower visitation rate of pollinators (Losapio et al., 2019). However, whether plant  
70 facilitation influences ecosystem functioning directly or indirectly through changes in  
71 biodiversity remains largely unclear. Filling this knowledge gap is crucial for  
72 understanding how biotic processes can stabilise ecosystem functioning.

73 Wright and colleagues (2017) proposed three main classes of facilitation  
74 mechanisms that positively contribute to ecosystem functioning: (i) indirect biotic  
75 facilitation, via reducing species-specific natural enemies (pathogens, herbivores); (ii)  
76 abiotic facilitation via nutrient enrichment, such as the legume–rhizobia symbiosis that  
77 directly increases nitrogen availability for neighbouring plants; (iii) abiotic amelioration  
78 via improving microclimatic conditions. These mechanisms are deduced from literature  
79 on biodiversity experiments carried out mainly on plant-species-richness gradient and  
80 biomass productivity in temperate meadows (Jiang, Pu & Nemergut, 2008). Thus, the  
81 potential of such biodiversity experiments to gather generalizable knowledge is limited  
82 to a small range of latitudes, systems, and ecological functions. Nevertheless, there is an  
83 increasing number of studies showing that diversity effects also work beyond plant  
84 communities (Schleuning et al., 2015; Rohr et al., 2020), and particularly across trophic  
85 levels (Losapio et al., 2020). For example, increasing plant species richness increases  
86 pollinator diversity and supports mutualistic network structure in temperate meadows  
87 (Ebeling et al. 2008; Scherber et al. 2010; Blüthgen & Klein 2011). Therefore, given that  
88 nurse plants improve both abiotic and biotic aspects of ecosystems, ultimately  
89 increasing biodiversity, and that plant diversity in turn increases pollinator diversity  
90 and ecosystem functioning, it is reasonable to hypothesize that facilitation and therein  
91 biodiversity have joint positive effects on mutualistic networks and ecosystem  
92 functioning (Fig. 1).

93 Here, we provide results of a study addressing this hypothesis and disentangling the  
94 relative contribution of nurse plants and increasing understorey plant diversity in  
95 driving pollination interactions. We asked the following questions: (i) What are the joint  
96 effects of nurse plants and understorey plant diversity on the pollinator community? (ii)  
97 What are the costs and benefits for the nurse plant in terms of pollination ? (iii) How do  
98 facilitation and diversity shape pollination interactions and mutualistic networks?

99

## 100 **2 MATERIALS AND METHODS**

### 101 **2.1 Study system**

102 We used a well-studied model system characterized by the nurse plant species *Retama*  
103 *sphaerocarpa* (L.) BOISS. (Fabaceae), a legume shrub associated with the development of  
104 "islands of fertility" under its canopy (Pugnaire et al., 1996; Schlesinger et al., 1996).  
105 Thanks to the symbiotic, mutualistic interactions with *Rhizobia* bacteria hosted in their  
106 roots, the inherent improvement of soil resources and overall amelioration of  
107 microhabitat conditions, this legume nurse plant facilitates a wide diversity of  
108 understorey plants (Moro et al., 1997; Armas, Rodríguez-Echeverría & Pugnaire, 2011;  
109 Rodríguez-Echeverría et al., 2013, 2016; Lozano et al., 2017). Furthermore, it produces  
110 copious yellow blooms pollinated by diverse insects, including small-, medium-, and  
111 large-sized Hymenoptera as well as several species of ants (Rodríguez-Riaño et al.,  
112 1999).

113 As understorey, we selected three annual herbaceous species that commonly grow  
114 with and without the nurse: *Matricaria chamomilla* L. (Asteraceae), *Echium*  
115 *plantagineum* L. (Boraginaceae), and *Carduus bourgeanus* Boiss. & Reut. (Asteraceae).  
116 *M. chamomilla* has white and yellow flowers in an open capitulum, *E. plantagineum* has  
117 purple tubular flowers along a raceme, and *C. bourgeanus* has blue flowers in a dense

118 capitulum. These three species therefore represent a broad set of flower morphology  
119 and pollination niches.

120 The study was carried out in an oak (*Quercus ilex* L.) savannah in a Mediterranean-  
121 type ecosystem at the Aprisco de Las Corchuelas research station in Torrejón el Rubio,  
122 Spain (39.81337 N -6.00022 W, 350 m a.s.l., mean rainfall of 637 mm/yr. and mean  
123 annual temperature of 18 °C).

## 124 **2.2 Experimental design**

125 In order to disentangle the role of direct facilitation by the nurse from that of indirect  
126 facilitation by the nurse through increased biodiversity on pollinators, and to further  
127 examine their joint effects on mutualistic networks, a fully-factorial experimental design  
128 including the following treatments was established (Fig. 1): (i) absence (open) and  
129 presence of the legume shrub (nurse); (ii) understorey richness with one (1 sp) and  
130 three (3 sp) plant species. This design results in the four treatment combinations of  
131 open-1sp, open-3sp, nurse-1sp, and nurse-3sp. Furthermore, a nurse alone treatment  
132 (nurse-0sp), i.e. a shrub without understorey plants, was included too. By comparing  
133 mono- and poly-cultures, this design allowed us addressing the costs and benefits of  
134 facilitation as well as the complementarity of plants for pollinators. A randomised block  
135 design was adopted by grouping together the five treatments and replicating them three  
136 times in each block over four blocks, for a total of  $n = 60$  plots. Distance between plots  
137 within the same block was approx. 1 m. Blocks were distributed randomly over an area  
138 of about 4,800 m<sup>2</sup>.

139 Plant and understorey flower density were kept constant by transplanting plants in  
140 pots. Pots were kept aggregated or sparse (c. 30 cm apart) below the nurse or in the  
141 open. This additional factor was replicated per block. The same pots of understorey  
142 plants were used for all blocks over two consecutive days before being replenished with

143 fresh blooms. In the nurse alone treatment with no understorey species, three empty  
144 pots with only soil were placed under the shrub to control for any potential effect of the  
145 pots. For the nurse treatments, shrubs were chosen of approx. the same size (height  
146 127–178 cm and width 125–220 cm). An area of 1 m<sup>2</sup> at 1 m height was used as the  
147 pollinator observation area in each shrub. Flowers of the surrounding vegetation within  
148 at least 1 m around each shrub and open area were cleared.

149 Flower visitation was considered as a proxy for the ecosystem function of  
150 pollination (Schleuning et al., 2015; IPBES, 2019). Flower visits were documented by  
151 sampling, identifying, and recording all insects visiting the flowers of each plant in each  
152 plot. Observations were conducted between 9 AM and 7 PM over eight days between 1  
153 May and 14 May 2017, covering the blooming phase of the four plant species. Each plot  
154 was observed during three slots of 20 min. randomly allocated over the day. Nurse  
155 plants and corresponding open plots have been observed simultaneously, reducing the  
156 disturbing effects of changing weather conditions within blocks. Each block was  
157 sampled completely within two days. Pollinators were identified at the species level  
158 whenever possible, otherwise to the genus. Specimens are conserved in 90% alcohol at  
159 our institution collections.

### 160 **2.3 Data analysis**

161 To answer the first question, we calculated the abundance and richness of pollinators in  
162 each plot, i.e., at the community level. We assessed the individual and combined effects  
163 of facilitation (nurse presence vs absence) and diversity (understorey species richness)  
164 on pollinator abundance and richness (two separate models) by means of Zero-inflated  
165 Generalized Linear Mixed Modelling (Zi-GLMM) with a negative binomial distribution  
166 (Brooks et al., 2017). Understorey aggregation was included as additional factor. Plant  
167 species composition and plot nested within block were considered as random effects.

168 To answer the second question, we calculated flower visits for each single plant  
169 species in each plot and conducted cost–benefit analysis. For understory plants, we  
170 assessed the individual and combined effects of nurse shrubs and understory species  
171 richness on pollinator abundance by means of Zi-GLMM with a negative binomial  
172 distribution. Understorey aggregation was included as additional factor. Plant species  
173 identity and plot nested within block were considered as random effects. For nurse  
174 shrubs, we assessed the effects of understory species richness (nurse alone, 1 species  
175 and 3 species; second-degree polynomial) on pollinator abundance by means of Zi-  
176 GLMM with a negative binomial distribution. Understorey aggregation was included as  
177 additional covariate. Understorey composition and plot nested within block were  
178 considered as random effects.

179 To answer the third question, we used a framework based on the variance  
180 partitioning of biodiversity effects (Loreau and Hector 2001) for the pollinator  
181 community (Losapio et al., 2020). This framework allows comparing the net impact of a  
182 diverse plant community on flower visits, distinguishing between complementarity and  
183 selection effects (Loreau and Hector 2001; Wright et al. 2017; Losapio et al., 2020).

184 First, we calculated complementarity effects (CE) and selection effects (SE) among

185 understory species as:  $CE = 3 \frac{Y_{mc} - 1}{M_{mc}} - 1, \frac{Y_{ep} - 1}{M_{ep}} - 1, \frac{Y_{cb} - 1}{M_{cb}} - 1 \over M_{mc}, M_{ep}, M_{cb}$ , and

186  $SE = 3 cov \left( \frac{Y_{mc} - 1}{M_{mc}} - 1, \frac{Y_{ep} - 1}{M_{ep}} - 1, \frac{Y_{cb} - 1}{M_{cb}} - 1, M_{mc}, M_{ep}, M_{cb} \right)$ , where  $Y$  and  $M$  indicate flower

187 visits in polyculture (three understory species) and monoculture (one understory species),

188 respectively, for each understory plant species (*M. chamomilla*, *E. plantagineum*, *C.*

189 *bourgeanus*). These effects were calculated both in the absence and presence of nurse

190 shrubs. This way, we tested the impact of plant facilitation on CE and SE. Then, the

191 diversity effects were tested in response to nurse presence, effect type, and their



192 interaction using a linear model. Second, we calculated CE and SE between nurse shrubs  
193 and understory species. This way, nurse and understory were considered as two  
194 distinct functional groups. These functional diversity effects were calculated as:

195 
$$CE = 2 \frac{\overline{Y_{ns}} - 1, \overline{Y_{us}} - 1}{\overline{M_{ns}}, \overline{M_{us}}}$$
 and 
$$SE = 2 cov \left( \frac{\overline{Y_{ns}} - 1, \overline{Y_{us}} - 1}{\overline{M_{ns}}, \overline{M_{us}}} \right)$$
, where  $Y$

196 and  $M$  indicate flower visits in polyculture (two functional diversity groups of nurse and  
197 understory) and monoculture (nurse and understory alone), respectively. These  
198 effects were calculated with both one and three understory species (nurse-1sp and  
199 open-1sp; nurse-3sp and open-3sp). This way, we tested how CE and SE change with  
200 plant diversity. Then, the diversity effects were tested in response to understory  
201 richness (categorical), effect type, and their interaction using a linear model.

202 To answer the third question, we built mutualistic networks between the four plant  
203 species and each of their pollinator species (or genus) according to the additive matrix  
204 framework (Losapio et al., 2019). This approach consists of building and comparing  
205 observed networks (hereafter, ‘synergistic’) with ‘additive’ networks. ‘Synergistic’  
206 networks are built using the plant-pollinator interactions data collected from the  
207 empirical plant community, here composed by the nurse shrub and the three  
208 understory species. Instead, ‘additive’ networks are built using data collected from the  
209 four treatments of nurse shrub and understory species monocultures and pooling  
210 plant-pollinator interactions into a single ‘additive’ matrix.

211 To quantify network structure, we measured network eigenvector centrality  
212 (Bonacich, 1987; Csardi & Nepusz, 2006). This metric quantifies the extent to which  
213 plant species with many pollinators are connected to pollinators that visit few species  
214 or poorly connected plants interact with a few central pollinators. Then, to understand  
215 the drivers of differences in mutualistic networks, we measured the dissimilarity

216 between the networks using the framework of beta-diversity of species interactions  
217 (Poisot, 2016). In particular, we considered the dissimilarity in species composition and  
218 pairwise plant–pollinator interactions. In this case, networks were considered at the  
219 block level. Network dissimilarity was calculated within ‘additive’ networks, within  
220 ‘synergistic’ networks, and between ‘additive’ and ‘synergistic’ networks. Differences  
221 among networks were tested in response to the dissimilarity index (species or  
222 interactions), dissimilarity within networks nested within dissimilarity between  
223 networks, and their interaction using a linear model.

224 Statistical results are reported in terms of variances explained, using type-II ANOVA  
225 (Fox & Weisberg, 2019), and parameter estimates with 95% Confidence Interval. In case  
226 of significant statistical interactions, contrasts among factor combinations were  
227 computed using estimated marginal means (Lenth, 2020).

228

## 229 **3 RESULTS**

### 230 **3.1 Pollinator community**

231 We found that both nurse presence ( $P < 0.001$ ) and diversity ( $P = 0.002$ ) significantly  
232 explain differences in visitor abundance at the community level (Fig. 2a), whereas  
233 aggregation and the interaction between nurse presence and diversity were not  
234 significant. In particular, the nurse shrub increases flower visitor abundance by 68%  
235 compared to open ( $\beta$ , 95% CI = 1.72, 0.99–2.45). Furthermore, increasing understorey  
236 plant diversity from one to three species increases flower visitor abundance by 19%  
237 (0.56, 0.22–2.92).

238 Similarly, nurse presence ( $P < 0.001$ ), diversity ( $P = 0.002$ ) and their statistical  
239 interaction ( $P = 0.040$ ) significantly influence pollinator species richness (Fig. 2b),  
240 whereas aggregation was not significant. On average, the presence of the nurse shrub

241 increases the richness of the pollinator community by 74% (1.6, 1.07–2.13), and  
242 increasing understorey plant diversity from one to three species increases richness by  
243 24% (0.34, 0.15–0.54). Furthermore, nurse presence and understorey diversity jointly  
244 influence pollinator richness, being the effects of diversity stronger in open ( $c = 0.69 \pm$   
245  $0.20$  SE,  $P = 0.005$ ) than underneath the nurse canopy ( $c = 0.19 \pm 0.14$  SE,  $P = 0.495$ ),  
246 and the effects of nurse presence stronger at low diversity ( $c = 1.35 \pm 0.17$ ,  $P < 0.001$ )  
247 than high diversity ( $c = 0.86 \pm 0.17$  SE,  $P < 0.001$ ).

### 248 **3.2 Benefits and costs**

249 We then explored the effects of facilitation and diversity on flower visitation rate per  
250 each species. Considering understorey plants, diversity had significant effects on flower  
251 visits ( $P < 0.001$ ), which was independent of aggregation, nurse presence or its  
252 interaction (Fig. 3a). In particular, increasing understorey diversity increased the  
253 number of flower visits on each understorey species by 34% (0.40, 0.14–0.54). Variance  
254 among species was low (0.013).

255 Considering the legume nurse shrub, both aggregation and diversity significantly  
256 influenced visitation rate ( $P = 0.045$  and  $P = 0.002$ , respectively). In particular,  
257 aggregating understorey plants increased visitor abundance for the nurse shrub by 10%  
258 (0.39, 0.01–0.76). Understorey diversity had non-linear effects on nurse's visitors (Fig.  
259 3b), being positive only at high richness (quadratic term 2.28, 0.98–3.59).

### 260 **3.3 Complementarity and selection effects**

261 We then explored diversity effects (i.e. complementarity and selection effects) among  
262 understorey species (Fig. 4a) and between nurse and understorey (Fig. 4b). In the case  
263 of understorey species richness, we found that diversity effects were independent of  
264 nurse shrubs but significantly varied between complementarity and selection effects ( $P$   
265  $< 0.001$ ), since selection effects were more negative than complementarity effects

266 positive (Fig. 4a). In particular, complementarity effects were marginally positive in the  
267 absence and presence of nurse shrubs (499, -33.1–1031; 517, -15.5–1049), respectively,  
268 while selection effects were negative in both cases (-754, -1286.3– -222; -771, -1302.9–  
269 -238).

270 In the case of the nurse–understorey combination, diversity effects between nurse  
271 and understorey plants changed with understorey species richness ( $P = 0.033$ )  
272 depending on effect type ( $P = 0.009$ ). While complementarity effects significantly  
273 increased with increasing understorey richness ( $c = 160.0 \pm 41.1$  SE,  $P = 0.002$ ),  
274 selection effects remained the same ( $c = 20.1 \pm 41.4$  SE,  $P = 0.495$ ). Furthermore,  
275 complementarity effects were negative and positive at low and high richness (-124.6, -  
276 188.3– -60.89; 36.2, -27.5–99.93), respectively, while selection effects were always  
277 marginally negative (-38.5, -102.2–25.26; -58.6, -122.3–5.14).

### 278 **3.4 Network change**

279 Finally, we explored mutualistic network centrality and dissimilarity between additive  
280 and synergistic networks. We found that synergistic networks were significantly less  
281 centralized than additive networks ( $\beta = -0.35$ ,  $P < 0.001$ , Fig. 5). Considering  
282 components of network dissimilarity, species turnover was twice as high as interaction  
283 change overall ( $c = 0.20 \pm 0.02$  SE,  $P < 0.002$ ), with dissimilarity in interaction change  
284 between synergistic networks being lower relative to dissimilarity in species  
285 composition between additive networks (-0.14, -0.25– -0.02).

286

## 287 **4 DISCUSSION**

288 Species interactions and biodiversity play a crucial role in shaping ecological networks  
289 and supporting ecosystem functioning, yet their joint effects remain poorly understood.  
290 Now we provide new evidence for the mingled consequences of plant facilitation and

291 diversity for mutualistic networks of pollination, a key ecosystem function. The results  
292 of our field experiment indicate that facilitation by legume nurse shrubs and  
293 understorey diversity synergistically increase the diversity of pollinators. Our findings  
294 reflect diverse assemblages in which complementarity and cooperation among different  
295 plants result in no costs for individual species but benefits for the functioning of the  
296 community and the ecosystem.

#### 297 **4.1 Community-scale benefits**

298 Results support the hypotheses that facilitation and biodiversity jointly influence  
299 mutualistic networks and ecosystem functions, as both nurse shrub and understorey  
300 diversity increase pollinator abundance and richness at the community level.

301 Facilitation can positively influence ecological networks beyond plant communities,  
302 including pollination networks (Losapio et al., 2019), arthropod food-webs (van der Zee  
303 et al., 2016), mammal communities (Lortie et al., 2016), and soil microorganisms  
304 (Rodríguez-Echeverría et al., 2013). Notably, benefits of facilitation involve not only the  
305 plant community itself but also scale up to flower visitors, whose diversity increases in  
306 nurse-understorey assemblages. Thus, the amelioration of biophysical environment by  
307 legume nurse shrubs favours both understorey species (Pugnaire 2010), directly via  
308 microhabitat improvement and indirectly via enhanced pollination, the plant  
309 community as a whole as well as the pollinator network. Underlying mechanisms may  
310 be enhanced floral display via increasing community-level attractiveness to generalist  
311 pollinators (Losapio et al. 2019), i.e., 'cluster effect' (Krugman, 1991), and service  
312 sharing (McIntire & Fajardo, 2014). Moreover, enhanced floral resources via soil  
313 symbionts of the legume nurse shrub (Harris, 2009; Rodríguez-Echeverría et al., 2016)  
314 may also be responsible for improving floral attractiveness in natural conditions.

315 Besides nurse shrub presence, increasing understorey diversity increases pollinator  
316 diversity, as the higher the floral diversity the higher the availability of resources for  
317 pollinators in polyculture as compared to monoculture. These results are consistent  
318 with previous studies showing that plant diversity, along with the co-varying factors  
319 including blossom cover and presence of particularly attractive flowering species,  
320 enhances both the frequency and the temporal stability of pollinator visits (Ebeling et  
321 al., 2008). In addition, flower visits increase with plant diversity when diverse flower  
322 displays increase the duration of flower provision (Fornoff et al., 2017) and widen  
323 pollination niches (Losapio et al., 2020). Since plant and flower density were kept  
324 constant in our experiment, the positive effects of understorey diversity on ecosystem  
325 functions are mainly driven by pollination niche complementarity and loss of poorly-  
326 attractive species, as discussed in the paragraph below (4.2).

327 Notably, the combination of facilitation and diversity effects produce even greater  
328 benefits for mutualistic networks than expected by these two factors alone. In fact,  
329 adding more understorey species (at constant plant and flower density) produce  
330 stronger effects on pollinator diversity in the absence of nurse shrubs as compared to  
331 their presence. That is, facilitation and diversity synergistically interact to influence  
332 ecosystem functioning. This is most likely due to the overwhelming facilitative effects of  
333 nurse shrubs and the non-linear nature of community assembly processes. The  
334 presence of nurse shrubs seems more important at low diversity, while increasing  
335 diversity seems more relevant in the absence of facilitation. Most importantly, our  
336 results show that plant–plant facilitation is an important driver of mutualistic networks  
337 and ecosystem functioning, both directly and indirectly via increasing biodiversity.

338 Cost–benefit analysis reveals that species-specific pollination facilitation results in  
339 neutral net effects for both nurse and understorey species and positive net effects of

340 biodiversity. That is, the benefits of facilitation for the whole community come at no  
341 costs for the individual species. It is not surprising that nurse shrubs do not necessarily  
342 increase flower visitation of understorey species, as the outcome of specific facilitation  
343 mechanisms is often context-dependent and varies in the short term (Montesinos-  
344 Navarro et al., 2019). In fact, facilitation for vegetative reproduction (establishment,  
345 growth, survival) can be independent from facilitation for sexual reproduction (Losapio  
346 et al., 2019). Interesting enough, the positive effects of biodiversity scale from  
347 communities to single species since there is a correspondence between increasing  
348 ecosystem functioning and increasing species visits. This is not always the case for  
349 biodiversity experiments, where an increase in community productivity does not  
350 necessarily follow an increase in species-specific biomass (Tilman et al., 2014).

#### 351 **4.2 Complementarity and selection effects**

352 The current understanding of the relationships between biodiversity and ecosystem  
353 functioning comes primarily from studies focusing on the effects of plant species  
354 richness on biomass production in temperate meadows (Jiang et al., 2008). While  
355 competition is often claimed to play a role in such system, facilitation is overlooked or  
356 lumped within several less explicitly defined processes as complementarity effects  
357 (Blüthgen & Klein 2011; Wright et al., 2017). The experimental framework we adopted  
358 here allows us manipulating both taxonomic and functional diversity in combination  
359 with facilitation, then measuring complementarity among understorey species as well  
360 as between nurse shrubs and understorey plants.

361 Our results indicate positive complementarity effects among understorey species.  
362 Furthermore, complementarity between nurse and understorey species increases with  
363 diversity. Results also indicate negative selection effects, suggesting that species with  
364 generally few pollinators benefit the most in the polyculture (understorey species),

365 while a species (possibly the nurse plant) with generally lots of pollinators does not.  
366 These provide new evidence for a novel facilitation process based on community-scale  
367 facilitation (Callaway, 2007; Liancourt & Dolezal 2020) and on the ‘cluster effect’  
368 (Krugman, 1991; Losapio et al., 2019) at different trophic levels: diverse flower  
369 assemblages including nurse shrubs are more attractive than monocultures thanks to  
370 increased visibility of the community as a whole for attracting a wider spectrum of  
371 visitors.

372 This way, being part of the polyculture cluster (nurse shrub with diverse  
373 understorey) would increase the chances of being visited, and eventually pollinated.  
374 Joint effects of diversity and community-scale facilitation involve not only the plant  
375 community itself but also flower visitors, whose diversity increased in nurse-  
376 understorey assemblages. Thus, the amelioration of the biophysical environment by  
377 legume nurse shrubs favours understorey species (Pugnaire 2010), directly via  
378 microhabitat improvement and indirectly via enhanced pollination, but also the plant  
379 community as a whole and its ecosystem functions.

#### 380 **4.3 Network change**

381 By means of the additive matrix framework (Losapio et al., 2019), we compared  
382 synergistic networks that emerge from the plant community as a whole with additive  
383 networks that result from pooling plant species as separate components. These two  
384 networks appear to be very different, highlighting the non-additivity of nurse and  
385 understorey plants. This shows that interactions among plants influence interactions  
386 between plants and pollinators. In particular, facilitative interactions among nurse and  
387 understorey plants influence pollination networks by changing the identity and  
388 frequency of flower visitors. Such nonadditive interactions change network structure,  
389 making the network more de-centralised than expected by additive effects, which may



390 ultimately improve the overall resistance and stability of pollinator communities  
391 (Blüthgen & Klein 2011). Furthermore, our results show that synergistic networks were  
392 more similar among each other in terms of species interactions as compared to the  
393 higher dissimilarity of species interactions observed among ‘additive’ networks. Drivers  
394 of network change are associated with increasing frequency of visits and potentially  
395 pollinator population density, thus affecting interaction strength, as well as changes in  
396 floral attractiveness and pollination niches, which ultimately promote species turnover  
397 and interaction rewiring.

398 Notice that this is different from a case of pollination facilitation (Feldman et al.,  
399 2004; Gazhoul, 2006; Braun & Lortie 2019), where the presence of a plant increases  
400 pollination of a neighbour, but the two do not always interact directly, e.g., facilitating  
401 germination and survival (Losapio and Schöb 2020). In the present case study, plant  
402 species are interacting directly via changes in microhabitat conditions and soil  
403 symbionts. Furthermore, we now show that they also interact indirectly via pollination  
404 networks.

405 In conclusion, our study shows that plant–plant facilitative systems where a nurse  
406 shrub increases understorey plant diversity positively influences pollination networks  
407 via both direct nurse effects and indirect plant diversity effects.

408

#### 409 **Acknowledgements**

410 GL and CS are grateful for financial support by the Swiss National Science Foundation  
411 (P2ZHP3\_187938, PZ00P3\_148261 and PP00P3\_170645).

412

#### 413 **Authors’ contributions**

414 GL and CS designed the study; EN conducted the experiment; LC, XE, CG, JO, AP and DS  
415 identified the specimens; GL analysed the data and wrote the manuscript with inputs  
416 from CS. All authors commented and approved the final publication.  
417 The authors have declared no competing interest.

418

#### 419 **Data availability**

420 The dataset will be published in the in the Dryad Digital Repository upon manuscript  
421 acceptance.

422

#### 423 **References**

- 424 Armas, C., Rodríguez-Echeverría, S., Pugnaire, F.I. (2011) A field test of the stress-  
425 gradient hypothesis along an aridity gradient. *Journal of Vegetation Science*, **22**, 818-  
426 827.
- 427 Bates, D., Maechler, M., Bolker, B., Walker, S. (2015) Fitting Linear Mixed-Effects Models  
428 Using lme4. *Journal of Statistical Software*, **67**, 1-48.
- 429 Bertness, M.D., Callaway, R. (1994) Positive interactions in communities. *Trends in*  
430 *Ecology and Evolution*, **9**, 191-193.
- 431 Blüthgen, N., Klein, A. (2011) Functional complementarity and specialisation: the role of  
432 biodiversity in plant–pollinator interactions. *Basic and Applied Ecology*, **12**, 282-291.
- 433 Bonacich, P. (1987) Power and Centrality: A Family of Measures. *American Journal of*  
434 *Sociology*, **92**, 1170-1182.
- 435 Braun, J., Lortie, C.J. (2019) Finding the bees knees: A conceptual framework and  
436 systematic review of the mechanisms of pollinator-mediated facilitation.  
437 *Perspectives in Plant Ecology, Evolution and Systematics*, **36**, 33-40.

- 438 Brooker, R.W., Maestre, F.T., Callaway, R.M., et al. (2008) Facilitation in plant  
439 communities: the past, the present, and the future. *Journal of Ecology*, **96**, 18-34.
- 440 Brooks, M.E., Kristensen, K., van Benthem, K.J., Magnusson, A., Berg, C.W., Nielsen, A.,  
441 Skaug, H.J., Maechler, M., Bolker, B.M. (2017). glmmTMB Balances Speed and  
442 Flexibility Among Packages for Zero-inflated Generalized Linear Mixed Modeling.  
443 *The R Journal*, **9**, 378-400.
- 444 Bruno, J.F., Stachowicz, J.J., Bertness, M.D. (2003) Inclusion of Facilitation into Ecological  
445 Theory. *Trends in Ecology and Evolution*, **18**, 119-125.
- 446 Butterfield, B.J., Cavieres, L.A., Callaway, R.M. (2013) Alpine cushion plants inhibit the  
447 loss of phylogenetic diversity in severe environments. *Ecology Letters*, **16**, 478-486.
- 448 Callaway, R.M. (2007) *Positive interactions and interdependence in plant communities*.  
449 Springer, The Netherlands.
- 450 Cavieres, L.A., Brooker, R.W., Butterfield, B.J., et al. (2014) Facilitative plant interactions  
451 and climate simultaneously drive alpine plant diversity. *Ecology Letters*, **17**, 193-  
452 202.
- 453 Chapin, F.S., Zavaleta, E.S., Eviner, V.T., et al. (2000) Consequences of changing  
454 biodiversity. *Nature*, **405**, 234-242.
- 455 Csardi, G., Nepusz, T. (2006) The igraph software package for complex network  
456 research. *International Journal Complex Systems*, **1695**. 2006. <http://igraph.org>
- 457 Connell, J. H., Slatyer, R. O. (1977) Mechanisms of succession in natural communities  
458 and their role in community stability and organization. *The American Naturalist*,  
459 **111**, 1119-1144.
- 460 DeAngelis, D.L., Post, W.M., Travis, C.C. (1986) *Positive Feedback in Natural Systems*.  
461 Springer, Berlin, Germany.

- 462 Ebeling, A., Klein, A.M., Schumacher, J., Weisser, W.W., Tschardtke, T. (2008) How does  
463 plant richness affect pollinator richness and temporal stability of flower visits?  
464 *Oikos*, **117**, 1808-1815.
- 465 Ellison, A.M. (2019) Foundation species, Non-trophic interactions, and the value of  
466 being common. *iScience*, **13**, 254-268.
- 467 Feldman, T. S., Morris, W. F., & Wilson, W. G. (2004). When can two plant species  
468 facilitate each other's pollination? *Oikos*, 105(1), 197–207.
- 469 Fox, J. & Weisberg, S. (2019). An {R} Companion to Applied Regression, Third Edition.  
470 Thousand Oaks CA: Sage. URL:  
471 <https://socialsciences.mcmaster.ca/jfox/Books/Companion/>
- 472 Gazhoul, J. (2006) Floral diversity and the facilitation of pollination. *Journal of Ecology*,  
473 **94**, 295-304.
- 474 Hooper, D.U., Chapin, F.S., Ewel, J.J., et al. (2005) Effects of biodiversity on ecosystem  
475 functioning: a consensus of current knowledge. *Ecological Monographs*, **75**, 3-35.
- 476 Hunter, A.F., Aarssen, L.W. (1988) Plants helping plants. *Bioscience*, **38**, 34–40.
- 477 Keddy, P. (2017) *Plant Ecology: Origins, Processes, Consequences*. Cambridge University  
478 Press, UK.
- 479 IPBES (2019) *Global assessment report on biodiversity and ecosystem services of the*  
480 *Intergovernmental Science-Policy Platform on Biodiversity and Ecosystem Services*. E.  
481 S. Brondizio, J. Settele, S. Díaz, and H. T. Ngo (editors). IPBES secretariat, Bonn,  
482 Germany.
- 483 Krugman, P. (1991). *Geography and Trade*. MIT Press.
- 484 Jiang, L., Pu, Z. & Nemergut, D.R. (2008) On the importance of the negative selection  
485 effect for the relationship between biodiversity and ecosystem functioning. *Oikos*,  
486 **117**, 488–493.

- 487 Lawton, J.H. (1999) Are there general laws in ecology? *Oikos*, **84**, 177-192.
- 488 Lenth, R. (2020). emmeans: Estimated Marginal Means, aka Least-Squares Means. R  
489 package version 1.4.8. <https://CRAN.R-project.org/package=emmeans>
- 490 Levin, S.A. (2009) *The Princeton Guide to Ecology*. Princeton University Press, USA.
- 491 Liancourt, P., Dolezal, J. (2020) Community-scale effects and strain: Facilitation beyond  
492 conspicuous patterns. *Journal of Ecology*, in press.
- 493 Loreau, M., Hector, A. (2001) Partitioning selection and complementarity in biodiversity  
494 experiments. *Nature*, **412**, 72-76.
- 495 Lortie, C.J., Filazzola, A. and Sotomayor, D.A. (2016), Functional assessment of animal  
496 interactions with shrub-facilitation complexes: a formal synthesis and conceptual  
497 framework. *Functional Ecology*, **30**, 41-51.
- 498 Losapio, G., Fortuna, M.A., Bascompte, J., et al. (2019) Plant interactions shape  
499 pollination networks via nonadditive effects. *Ecology*, **100**, e02619.
- 500 Losapio, G., Schmid, B., Bascompte, J., et al., (2020) Assessing the impact of ecosystem  
501 engineers on biodiversity and ecosystem functions across trophic levels.  
502 Unpublished data.
- 503 Losapio, G., Schöb, C. (2020) Pollination interactions reveal direct costs and indirect  
504 benefits of plant-plant facilitation for ecosystem engineers. *Journal of Plant Ecology*,  
505 **13**, 107–113.
- 506 Lozano, Y.M., Armas, C., Hortal, S., Casanoves, F., Pugnaire, F.I. 2017. Disentangling  
507 above- and below-ground facilitation drivers in arid environments: the role of soil  
508 microorganisms, soil properties and microhabitat. *New Phytologist*, **216**, 1236–  
509 1246.
- 510 McIntire, E.J., Fajardo, A. (2014) Facilitation as a ubiquitous driver of biodiversity. *New*  
511 *Phytologist*, **201**, 403-416.

- 512 Michalet, R., Touzard, B. (2010) *Biotic interactions, biodiversity, and community*  
513 *productivity*. In (eds. F.I. Pugnaire) Positive plant interactions and community  
514 dynamics. Taylor & Francis, USA.
- 515 Moro, M. J., Pugnaire, F. I., Haase, P., & Puigdefabregas, J. (1997). Effect of the Canopy of  
516 *Retama sphaerocarpa* on Its Understorey in a Semiarid Environment. *Functional*  
517 *Ecology*, **11**, 425–431.
- 518 Poisot, T. (2016). betalink: Beta-Diversity of Species Interactions. R package version  
519 2.2.1. <https://CRAN.R-project.org/package=betalink>
- 520 Pugnaire, F.I., Haase, P., Puigdefabregas, J. (1996) Facilitation between higher plant  
521 species in a semiarid environment. *Ecology*, **77**, 1420-1426.
- 522 Rodríguez-Echeverría S, Armas C, Pistón N, Hortal S, Pugnaire FI. 2013. A role for below  
523 ground biota in plant–plant facilitation. *Journal of Ecology* 101: 1420–1428.
- 524 Rodríguez-Echeverría S, Lozano YM, Bardgett RD. 2016. Influence of soil microbiota in  
525 nurse plant systems. *Functional Ecology* 30: 30–40.
- 526 Rodríguez-Riaño, T., Ortega-Olivencia, A. & Devesa, J.A. (1999) Reproductive phenology  
527 in three Genisteae (Fabaceae) shrub species of the W Mediterranean Region. *Nordic*  
528 *J. Bot.* 19: 345-3
- 529 Rohr, J.R., Civitello, D.J., Hlliday, F.W., Hudson, P.J., Lafferti, K., Wood, C.L., Mordecai, E.A.  
530 (2020) Towards common ground in the biodiversity–disease debate. *Nature Ecology*  
531 *& Evolution*, **4**, 24–33
- 532 Scherber, C., Eisenhauer, N., Weisser, W., et al. (2010) Bottom-up effects of plant  
533 diversity on multitrophic interactions in a biodiversity experiment. *Nature*, **468**,  
534 553-556.
- 535 Schlesinger, W.H, Raikes, J.A., Hartley A.E., Cross, A.F. (1996) On the Spatial Pattern of  
536 Soil Nutrients in Desert Ecosystems. *Ecology*, **77**, 364-374.

- 537 Schleuning, M., Fründ, J., García, D. (2015) Predicting ecosystem functions from  
538 biodiversity and mutualistic networks: an extension of trait-based concepts to  
539 plant–animal interactions. *Ecography*, **38**, 380-392.
- 540 Schöb, C., Brooker, R.W., Zuppinger-Dingley, D. (2018) Evolution of facilitation requires  
541 diverse communities. *Nature Ecology & Evolution*, **2**, 1381-1385.
- 542 Tilman, D., Isbell, F., Cowles, J.M. (2014) Biodiversity and Ecosystem Functioning.  
543 *Annual Review of Ecology, Evolution, and Systematics*, **45**, 471-493.
- 544 Wright, A.J., Wardle, D.A., Callaway, R., Gaxiola, A. (2017) The overlooked role of  
545 facilitation in biodiversity experiments. *Trends in Ecology and Evolution*, **32**, 383-  
546 390.
- 547 Wright, J.P., Jones, C.G.P. (2004) Predicting effects of ecosystem engineers on patch-scale  
548 species richness from primary productivity. *Ecology*, **85**, 2071-2081.
- 549

550 **Figures and tables**

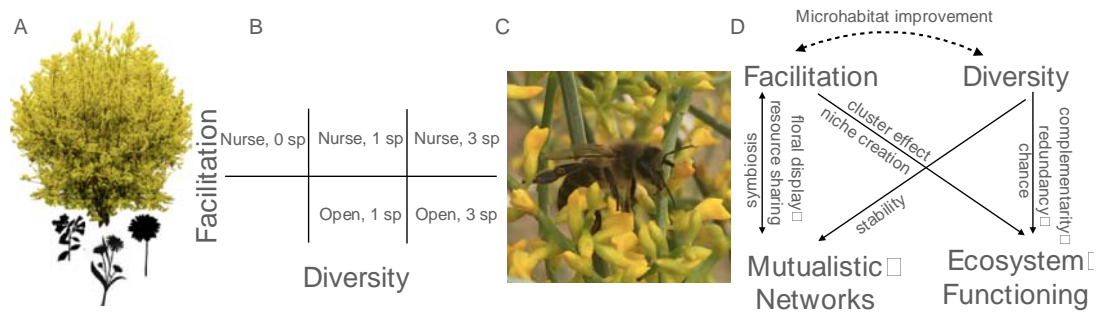

551

552 **Fig. 1** Conceptual framework and experimental design. (A) A legume nurse shrub  
 553 (*Retama sphaerocarpa*) facilitates diverse herbaceous plant species in the understory.  
 554 (B) To examine the joint effects of plant facilitation and biodiversity change on  
 555 mutualistic networks, the experimental design includes the treatments of nurse  
 556 presence/absence and understory species richness. Plant and flower density of  
 557 understory species were kept constant. Furthermore, a nurse alone treatment (i.e.,  
 558 shrub without understory plants) was included. (C) We then examined the response of  
 559 pollination interactions, such as those between *Apis mellifera* and *Retama sphaerocarpa*.  
 560 (D) Process pathways among facilitation, diversity, mutualistic networks and ecosystem  
 561 functioning.

562



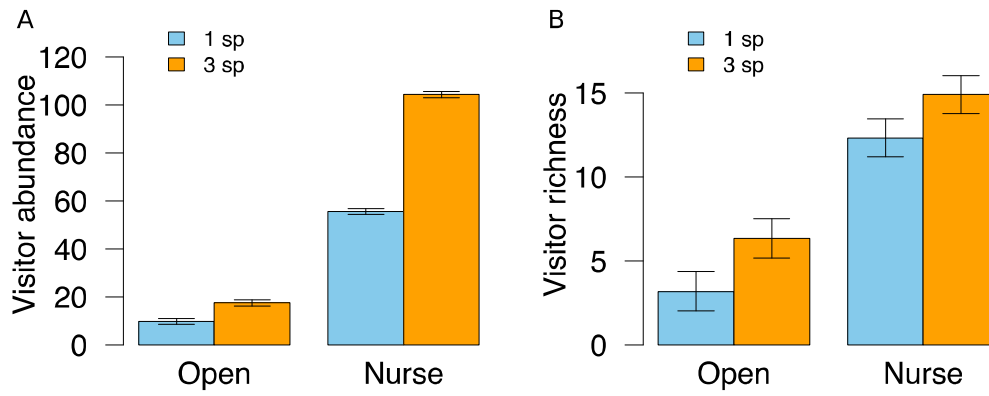

563

564 **Fig. 2** Effects of facilitation (open vs nurse) and biodiversity (1 vs 3 species) on

565 abundance (A) and richness (B) of the pollinator community (i.e., flower visitors) per

566 plot. Bars indicate SE.

567

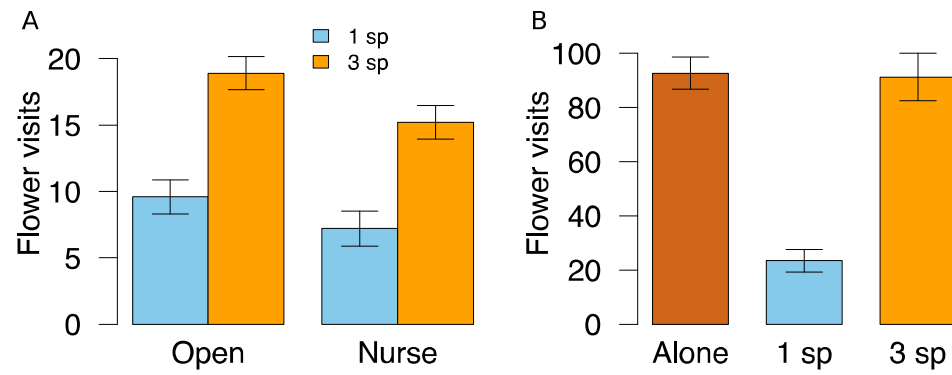

568

569 **Fig. 3** Cost and benefit analysis of facilitation (open vs nurse) and biodiversity (1 vs 3

570 understorey species) for understorey plants (A) and nurse shrubs (B) in each plot. Bars

571 indicate SE.

572

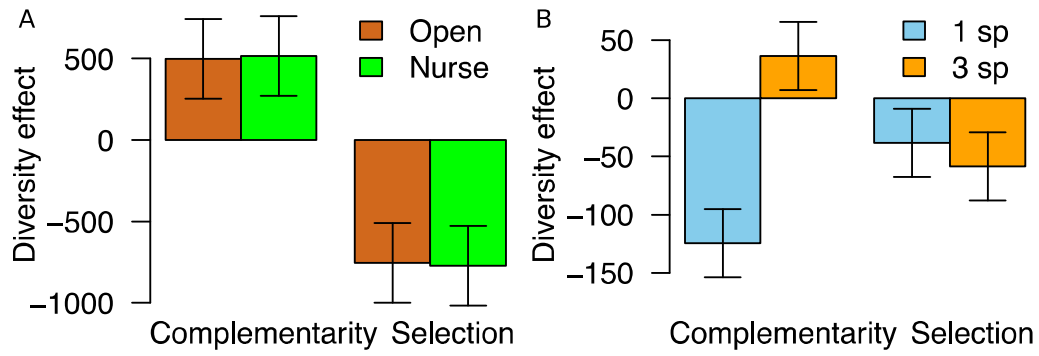

573

574 **Fig. 4** Consequences of facilitation (open vs nurse) for complementarity and selection

575 effects among understory species (A). Complementarity and selection effects between

576 nurse plants and understory species (B). Bars indicate SE.

577

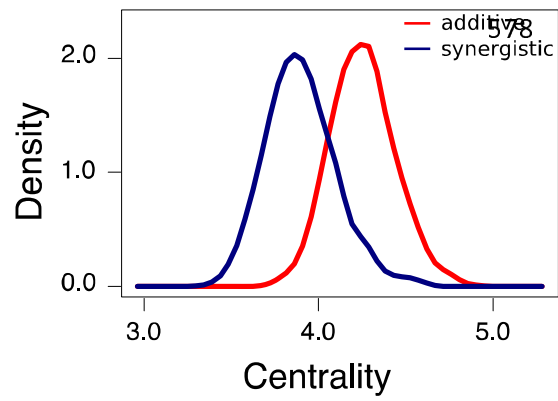

579

580 **Fig. 5** Network centrality of additive networks (red) and synergistic networks (blue).
